# Supplementary material
Source: PubMed Central journal article supplement (PMC3522284)
Supplement: supp_M112.426833_jbc.M112.426833-1.pdf [file supp_M112.426833_jbc.M112.426833-1.pdf]

**SUPPLEMENTAL TABLE****SECRETED PROTEINS WITH AN N-TERMINAL CYSTEINE (Human)**

| Protein ID                         | Name                  | N-terminal sequence | Notes                                                                               | Refs  |
|------------------------------------|-----------------------|---------------------|-------------------------------------------------------------------------------------|-------|
| <b>Hedgehog Family</b>             |                       |                     |                                                                                     |       |
| SHH                                | Sonic Hedgehog        | CGPGRGFGKR          | Palmitoylated in cells and <i>in vitro</i>                                          | S1,S2 |
| IHH                                | Indian Hedgehog       | CGPGRVVGSR          | Palmitoylated <i>in vitro</i>                                                       | S1    |
| DHH                                | Desert Hedgehog       | CGPGRGPVGR          | Likely to be palmitoylated                                                          |       |
| <b>MHC Class I/HLA Heavy Chain</b> |                       |                     |                                                                                     |       |
| 1C01                               | MHC-I/HLA heavy chain | CSHSMKYFFT          |                                                                                     |       |
| 1C02                               | "                     | CSHSMRYFYT          |                                                                                     |       |
| 1C05                               | "                     | CSHSMRYFYT          |                                                                                     |       |
| 1C06                               | "                     | CSHSMRYFDT          |                                                                                     |       |
| 1C07                               | "                     | CSHSMRYFDT          |                                                                                     |       |
| 1C08                               | "                     | CSHSMRYFYT          |                                                                                     |       |
| 1C012                              | "                     | CSHSMRYFYT          |                                                                                     |       |
| 1C014                              | "                     | CSHSMRYFST          |                                                                                     |       |
| 1C015                              | "                     | CSHSMRYFYT          |                                                                                     |       |
| 1C016                              | "                     | CSHSMRYFYT          |                                                                                     |       |
| 1C018                              | "                     | CSHSMRYFDT          |                                                                                     |       |
| <b>Interferons</b>                 |                       |                     |                                                                                     |       |
| IFNA1                              | Interferon            | CDLPETHSLD          | IFNs are unlikely to be palmitoylated; N-terminal Cys is disulfide bonded to Cys-98 | S3    |
| IFNA2                              | "                     | CDLPQTHSLG          |                                                                                     |       |
| IFNA4                              | "                     | CDLPQTHSLG          |                                                                                     |       |
| IFNA7                              | "                     | CDLPQTHSLR          |                                                                                     |       |
| IFNA8                              | "                     | CDLPQTHSLG          |                                                                                     |       |
| IFN10                              | "                     | CDLPQTHSLG          |                                                                                     |       |
| IFN14                              | "                     | CNLSQTHSLN          |                                                                                     |       |
| IFN16                              | "                     | CDLPQTHSLG          |                                                                                     |       |
| IFN17                              | "                     | CDLPQTHSLG          |                                                                                     |       |
| IFN21                              | "                     | CDLPQTHSLG          |                                                                                     |       |

| <b><u>Proteases/Protease Inhibitors</u></b> |                                                      |            |                                                                 |           |
|---------------------------------------------|------------------------------------------------------|------------|-----------------------------------------------------------------|-----------|
| ELA2A                                       | Elastase 2A proprotein                               | CGDPTYPPYV | N-terminal Cys is disulfide bonded to Cys-122 in mature protein | S4        |
| ELA2B                                       | Pancreatic elastase 2B                               | CGVSTYAPDM | "                                                               |           |
| CTRL                                        | Chymotrypsin-like protease                           | CGIPAIKPAL | "                                                               |           |
| CTRB1                                       | Chymotrypsinogen precursor                           | CGVPAIHPVL | "                                                               |           |
| CTRB2                                       | Chymotrypsinogen precursor                           | CGVPAIHPVL | "                                                               |           |
| C1RL                                        | Complement C1R                                       | CPTRGSVLLA |                                                                 |           |
| CPN2                                        | Carboxypeptidase N subunit 2                         | CPMGCDCFVQ |                                                                 |           |
| TIMP1                                       | Tissue inhibitor of metalloproteases                 | CTCVPPHPQT | N-terminal Cys is disulfide bonded to Cys-70                    | S5,<br>S6 |
| TIMP3                                       | Tissue inhibitor of metalloproteases                 | CTCSPSHPQD | "                                                               |           |
| OVOS1                                       | Ovostatin homolog 1; serine protease inhibitor       | CVHMCMRDAL |                                                                 |           |
| OTGLL                                       | Otogelin (trypsin inhibitor)                         | CPYECLNGAF |                                                                 |           |
|                                             |                                                      |            |                                                                 |           |
| <b><u>Misc Receptors</u></b>                |                                                      |            |                                                                 |           |
| GP126                                       | G protein coupled receptor 126                       | CANCRVVLSN |                                                                 |           |
| EMR4                                        | G protein coupled receptor 127                       | CPPCPKYASC |                                                                 |           |
| RTN4R                                       | Nogo Receptor/Reticulon-4-Receptor                   | CPGACVCYNE | N-terminal Cys is disulfide bonded to Cys-33                    | S7        |
| R4RL1                                       | reticulon-4 receptor-like 1 precursor; Nogo Receptor | CPRDCVCYPA | "                                                               |           |
| NTRK2                                       | BDNF/NT-3, neurotrophic RPTK                         | CPTSCKCSAS | N-terminal Cys is disulfide bonded to Cys-7                     | S8        |
| I12R1                                       | Interleukin 12 receptor $\beta$ 1                    | CRTSECCFQD |                                                                 |           |
| IL21R                                       | Interleukin-21 receptor isoform 2 precursor          | CPDLVCYTDY |                                                                 |           |
| NTRK3                                       | neurotrophic tyrosine kinase NT-3 receptor           | CPANCVCSKT |                                                                 |           |
| FSHR                                        | follicle stimulating hormone receptor                | CHHRICHCSN |                                                                 |           |
| I17RD                                       | interleukin-17 receptor D precursor                  | CLNGSQLAVA |                                                                 |           |
| CD244                                       | natural killer cell receptor 2B4 isoform 3 precursor | CQGSADHVVS |                                                                 |           |
|                                             |                                                      |            |                                                                 |           |
| <b><u>Matrix/Adhesion proteins</u></b>      |                                                      |            |                                                                 |           |
| MXRA5                                       | matrix-remodeling-associated protein 5               | CPHPCACYVP |                                                                 |           |
| CHAD                                        | chondroadherin precursor; cartilage matrix protein   | CPQNCHCHSD |                                                                 |           |
| DSC1                                        | Desmocollin-1; desmosome adhesion                    | CQKVYLRVPS | Signal P does not predict                                       |           |

|                         |                                                                 |             |                                                                                                            |          |
|-------------------------|-----------------------------------------------------------------|-------------|------------------------------------------------------------------------------------------------------------|----------|
|                         |                                                                 |             | N-terminal Cys                                                                                             |          |
| <b>Miscellaneous</b>    |                                                                 |             |                                                                                                            |          |
| FETUB                   | Fetuin B (serum prtn)                                           | CGAMSPQQLA  | Signal P does not predict N-terminal Cys                                                                   |          |
| CETP                    | cholesterol ester transfer protein                              | CSKGTSHVEAG | N-terminal Cys is free                                                                                     | S9       |
| PHLD                    | Phospholipase D (GPI-specific)                                  | CGLSTHVEIG  |                                                                                                            |          |
| SYNLE                   | Slit-1 homologue                                                | CSSVCQLCTG  |                                                                                                            |          |
| SLIT1                   | SLIT-1                                                          | CPALCTCTGT  |                                                                                                            |          |
| SLIT3                   | SLIT-3                                                          | CPTKCTCSAA  |                                                                                                            |          |
| PERT                    | Thyroid peroxidase                                              | CTEAFFPFIS  |                                                                                                            |          |
| VASN                    | vasorin precursor; Slit-like 2                                  | CPSGCQCSQP  |                                                                                                            |          |
| NEU1                    | oxytocin-neurophysin 1 preproprotein                            | CYIQNCPLGG  | N-term Cys is disulfide bonded to Cys-6                                                                    | S10      |
| NEU2                    | vasopressin-neurophysin preproprotein                           | CYFQNCPRGG  | N-term Cys is disulfide bonded to Cys-6                                                                    | "        |
| DNS2A                   | deoxyribonuclease-2-alpha precursor                             | CYGDGQPVD   |                                                                                                            |          |
| CS041                   | SCRL- variant; izumo sperm-egg fusion protein                   | CLQCDPLVLE  |                                                                                                            |          |
| IZUM1                   | izumo sperm-egg fusion protein 1                                | CVICDPSVVL  |                                                                                                            |          |
| CO6                     | Complement component C6                                         | CFCDHYAWTQ  | N-term Cys is disulfide bonded to Cys-44                                                                   | S11, S12 |
| FGF7                    | FGF7                                                            | CNDMTPEQMA  | N-term Cys is disulfide bonded to Cys-15                                                                   | S13      |
| BMP6                    | BMP6                                                            | CCGPPPLRPP  | N-term is cleaved off                                                                                      | S14      |
| TWSG1                   | twisted gastrulation protein homolog-1; regulates BMP signaling | CNKALCASDV  |                                                                                                            |          |
| STIM2                   | stromal interaction molecule 2; CRAC activation                 | CELVPRHLRG  |                                                                                                            |          |
| MCP                     | CD46 antigen, complement regulatory protein                     | CEEPPTFEAM  | Not in rafts                                                                                               | S15      |
| APOC4                   | Apolipoprotein C-IV                                             | CQPEAQEGTL  |                                                                                                            |          |
| RAMP1                   | receptor activ-modifying prtnl                                  | CQEANYGALL  |                                                                                                            |          |
| INHA                    | inhibin A alpha chain preproprotein                             | CQGLELAREL  |                                                                                                            |          |
| RGMA                    | repulsive guidance molecule A precursor                         | CKILKCNSEF  |                                                                                                            |          |
|                         |                                                                 |             |                                                                                                            |          |
| <b>Unknown function</b> |                                                                 | * *         |                                                                                                            |          |
| LRFN2                   | leucine-rich repeat & FN type-III domain protein                | CPKYCVCQNL  | Contains a leucine-rich repeat Cysteine knot motif, CXXXC; N-term Cys is likely disulfide bonded to Cys +4 | S16      |
| LRFN4                   | leucine-rich repeat & FN type-III domain protein                | CPLPCVCQNL  | "                                                                                                          |          |

|       |                                                                  |            |   |  |
|-------|------------------------------------------------------------------|------------|---|--|
| LRC3B | leucine-rich repeat-containing protein 3B precursor              | CPKGCLCSSS | " |  |
| LRC38 | leucine-rich repeat-containing protein 38                        | CPAGCACTDP | " |  |
| ISLR  | immunoglobulin superfamily leu-rich repeat variant               | CPEPCDCGEK | " |  |
| FLRT2 | leucine-rich repeat transmembrane protein FLRT2                  | CPSVCRCDRN | " |  |
| LRRC3 | leucine-rich repeat-containing protein 3                         | CPQPCRCPDH | " |  |
| LRRT2 | leucine-rich repeat transmembrane neuronal protein 2             | CPPKCRCEKL | " |  |
| IGS10 | immunoglobulin superfamily member 10                             | CPRRCACYMP |   |  |
| IGSF6 | immunoglobulin superfamily member 6                              | CTLSVTQPWY |   |  |
| CCDC3 | coiled-coil domain-containing protein 3 precursor                | CQLPSEWRPL |   |  |
| K0574 | hypothetical protein                                             | CQNAQLVNSL |   |  |
| TMM95 | transmembrane protein 95                                         | CVFCRLPAHD |   |  |
| LPLC3 | long palate, lung and nasal epithelial carcinoma-assoc protein 3 | CQELLETVGT |   |  |
| T132A | unknown transmembrane protein                                    | CGQAPLDPVY |   |  |

### Supplemental Table Legend

Secreted proteins from the human genome that are predicted to contain an N-terminal Cys after signal sequence cleavage are listed. Proteins whose palmitoylation status has been confirmed or is likely are shaded in green. Proteins that are unlikely to be N-palmitoylated are shaded in red. See text for further details.

### Supplemental References

- S1. Pepinsky RB, Zeng C, Wen D, Rayhorn P, Baker DP, Williams KP, Bixler SA, Ambrose CM, Garber EA, Miatkowski K, Taylor FR, Wang EA, Galdes A. (1988) *J. Biol. Chem.* **273**,14037-45.
- S2. Buglino, J.A. and Resh, M.D. (2008) Hhat is a palmitoylacyltransferase with specificity for N-palmitoylation of Sonic Hedgehog. *J. Biol. Chem.* **283**, 22076-22088.
- S3. Wetzels, R. (1981) *Nature* **289**, 606-607.
- S4. Kardo, J., Bodi, A., Zavodszky, P., Venekei, I., and Graf, L. (1999) *Biochemistry* **38**, 12248-12257.
- S5. Williamson RA, Marston FA, Angal S, Koklitis P, Panico M, Morris HR, Carne AF, Smith BJ, Harris TJ, and Freedman RB. (1990) *Biochem J.* **268**, 267-274.
- S6. Caterina NC, Windsor LJ, Yermovsky AE, Bodden MK, Taylor KB, Birkedal-Hansen H, Engler JA. (1997) *J. Biol. Chem.* **272**, 32141-32149.
- S7. He XL, Bazan JF, McDermott G, Park JB, Wang K, Tessier-Lavigne M, He Z, Garcia KC. (2003) *Neuron* **38**, 177-185
- S8. Haniu M, Talvenheimo J, Le J, Katta V, Welcher A, Rohde MF. (1995) *Arch Biochem Biophys* **322**,256-264.
- S9. Kotake H, Agellon LB, Yokoyama S. (1997) *Biochim. Biophys. Acta* **1347**,69-74.
- S10. Yeo, P.L. and Rabenstein, D.L. (1993) *Anal. Chem.* **65**, 3061-3066.

- S11. Haefliger JA, Tschopp J, Vial N, Jenne DE. (1989) *J. Biol. Chem.* **264**, 18041-18051.
- S12. DiScipio RG and Hugli TE. (1989) *J. Biol. Chem.* **264**, 16197-16206.
- S13. Hsu YR, Hsu EW, Katta V, Brankow D, Tseng J, Hu S, Morris CF, Kenney WC, Lu HS (1998) *Protein Expr. Purif.* **12**, 189-200.
- S14. Gitelman SE, Kobrin MS, Ye JQ, Lopez AR, Lee A, Derynck R. (1994) *J. Cell Biol.* **126**, 1595-1609.
- S15. Ghannam A, Hammache D, Matias C, Louwagie M, Garin J, Gerlier D. (2008) *Mol. Immunol.* **45**, 3036-3044.
- S16. McEwan PA, Scott PG, Bishop PN, Bella J. (2006) *J. Struct. Biol.* **155**, 294-305.
